# Supplementary material for: Micro-dynamics mechanism of the phase transition behavior of poly(N-isopropylacrylamide-co-2-hydroxyethyl methacrylate) hydrogels revealed by two-dimensional correlation spectroscopy
Source: Royal Society of Chemistry journal article supplement (doi:10.1039/c6py01935h), 2016-12-16
Supplement: c6py01935h1.pdf [file c6py01935h1.pdf]

**Supporting Information**  
**for**  
**Micro-dynamic mechanism of the phase transition**  
**behavior of poly(*N*-isopropylacrylamide-*co*-2-hydroxyethyl**  
**methacrylate) hydrogel revealed by two-dimensional**  
**correlation spectroscopy**

*Gehong Su, Tao Zhou,\* Xifei Liu, Yanan Ma*

State Key Laboratory of Polymer Materials Engineering of China, Polymer Research Institute,  
Sichuan University, Chengdu 610065, China

\*Corresponding author. Tel.: +86-28-85402601; Fax: +86-28-85402465. E-mail address:  
zhoutaopoly@scu.edu.cn (T. Zhou)

**Table S1.** The sequential orders of process I (21.8–31.4 °C) obtained from the synchronous and asynchronous 2D correlation FTIR spectra of **Fig. 7**.

| Cross peaks (cm <sup>-1</sup> , cm <sup>-1</sup> )                                                                                      | Synchronous | Asynchronous | Sequential order |
|-----------------------------------------------------------------------------------------------------------------------------------------|-------------|--------------|------------------|
| (2990, 2947)                                                                                                                            | +           | +            | 2990→2947        |
| 2990cm <sup>-1</sup> → 2947cm <sup>-1</sup>                                                                                             |             |              |                  |
| (1716, 1706)                                                                                                                            | +           | +            | 1716→1706        |
| (1716, 1688)                                                                                                                            | +           | -            | 1688→1716        |
| (1706, 1688)                                                                                                                            | +           | -            | 1688→1706        |
| 1688cm <sup>-1</sup> → 1716cm <sup>-1</sup> → 1706cm <sup>-1</sup>                                                                      |             |              |                  |
| (1652, 1648)                                                                                                                            | +           | +            | 1652→1648        |
| (1652, 1623)                                                                                                                            | -           | +            | 1623→1652        |
| (1652, 1618)                                                                                                                            | -           | +            | 1618→1652        |
| (1648, 1623)                                                                                                                            | -           | +            | 1623→1648        |
| (1648, 1618)                                                                                                                            | -           | +            | 1618→1648        |
| (1623, 1618)                                                                                                                            | +           | +            | 1623→1618        |
| 1623cm <sup>-1</sup> → 1618cm <sup>-1</sup> → 1652cm <sup>-1</sup> → 1648cm <sup>-1</sup>                                               |             |              |                  |
| (2990, 1716)                                                                                                                            | +           | -            | 1716→2990        |
| (2990, 1706)                                                                                                                            | +           | -            | 1706→2990        |
| (2990, 1688)                                                                                                                            | +           | -            | 1688→2990        |
| (2947, 1716)                                                                                                                            | +           | -            | 1716→2947        |
| (2947, 1706)                                                                                                                            | +           | -            | 1706→2947        |
| (2947, 1688)                                                                                                                            | +           | -            | 1688→2947        |
| 1688cm <sup>-1</sup> → 1716cm <sup>-1</sup> → 1706cm <sup>-1</sup> → 2990cm <sup>-1</sup> → 2947cm <sup>-1</sup>                        |             |              |                  |
| (2990, 1652)                                                                                                                            | -           | +            | 1652→2990        |
| (2990, 1648)                                                                                                                            | -           | +            | 1648→2990        |
| (2990, 1623)                                                                                                                            | +           | -            | 1623→2990        |
| (2990, 1618)                                                                                                                            | +           | -            | 1618→2990        |
| (2947, 1652)                                                                                                                            | -           | +            | 1652→2947        |
| (2947, 1648)                                                                                                                            | -           | +            | 1648→2947        |
| (2947, 1623)                                                                                                                            | +           | -            | 1623→2947        |
| (2947, 1618)                                                                                                                            | +           | -            | 1618→2947        |
| 1623cm <sup>-1</sup> → 1618cm <sup>-1</sup> → 1652cm <sup>-1</sup> → 1648cm <sup>-1</sup> → 2990cm <sup>-1</sup> → 2947cm <sup>-1</sup> |             |              |                  |
| (1716, 1652)                                                                                                                            | -           | -            | 1716→1652        |
| (1716, 1648)                                                                                                                            | -           | -            | 1716→1648        |
| (1716, 1623)                                                                                                                            | +           | +            | 1716→1623        |
| (1716, 1618)                                                                                                                            | +           | +            | 1716→1618        |
| (1706, 1652)                                                                                                                            | -           | +            | 1652→1706        |
| (1706, 1648)                                                                                                                            | -           | +            | 1648→1706        |
| (1706, 1623)                                                                                                                            | +           | -            | 1623→1706        |
| (1706, 1618)                                                                                                                            | +           | -            | 1618→1706        |
| (1688, 1652)                                                                                                                            | -           | -            | 1688→1652        |
| (1688, 1648)                                                                                                                            | -           | -            | 1688→1648        |
| (1688, 1623)                                                                                                                            | +           | +            | 1688→1623        |
| (1688, 1618)                                                                                                                            | +           | +            | 1688→1618        |

|                                                                                                                                                                                                              |
|--------------------------------------------------------------------------------------------------------------------------------------------------------------------------------------------------------------|
| 1688cm <sup>-1</sup> → 1716cm <sup>-1</sup> → 1623cm <sup>-1</sup> → 1618cm <sup>-1</sup> → 1652cm <sup>-1</sup> → 1648cm <sup>-1</sup> → 1706cm <sup>-1</sup>                                               |
| 1688cm <sup>-1</sup> → 1716cm <sup>-1</sup> → 1623cm <sup>-1</sup> → 1618cm <sup>-1</sup> → 1652cm <sup>-1</sup> → 1648cm <sup>-1</sup> → 1706cm <sup>-1</sup> → 2990cm <sup>-1</sup> → 2947cm <sup>-1</sup> |

**Table S2.** The sequential orders of process II (31.4–36.5 °C) obtained from the synchronous and asynchronous 2D correlation FTIR spectra of **Fig. 8**.

| Cross peaks (cm <sup>-1</sup> , cm <sup>-1</sup> )                                                                                      | Synchronous | Asynchronous | Sequential order |
|-----------------------------------------------------------------------------------------------------------------------------------------|-------------|--------------|------------------|
| (2990, 2947)                                                                                                                            | +           | -            | 2947→2990        |
| 2947cm <sup>-1</sup> → 2990cm <sup>-1</sup>                                                                                             |             |              |                  |
| (1716, 1706)                                                                                                                            | +           | +            | 1716→1706        |
| (1716, 1688)                                                                                                                            | +           | +            | 1716→1688        |
| (1706, 1688)                                                                                                                            | +           | +            | 1706→1688        |
| 1716cm <sup>-1</sup> → 1706cm <sup>-1</sup> → 1688cm <sup>-1</sup>                                                                      |             |              |                  |
| (1652, 1648)                                                                                                                            | +           | -            | 1648→1652        |
| (1652, 1623)                                                                                                                            | -           | +            | 1623→1652        |
| (1652, 1618)                                                                                                                            | -           | +            | 1618→1652        |
| (1648, 1623)                                                                                                                            | -           | +            | 1623→1648        |
| (1648, 1618)                                                                                                                            | -           | +            | 1618→1648        |
| (1623, 1618)                                                                                                                            | +           | -            | 1618→1623        |
| 1618cm <sup>-1</sup> → 1623cm <sup>-1</sup> → 1648cm <sup>-1</sup> → 1652cm <sup>-1</sup>                                               |             |              |                  |
| (2990, 1716)                                                                                                                            | +           | -            | 1716→2990        |
| (2990, 1706)                                                                                                                            | +           | -            | 1706→2990        |
| (2990, 1688)                                                                                                                            | +           | +            | 2990→1688        |
| (2947, 1716)                                                                                                                            | +           | +            | 2947→1716        |
| (2947, 1706)                                                                                                                            | +           | +            | 2947→1706        |
| (2947, 1688)                                                                                                                            | +           | +            | 2947→1688        |
| 2947cm <sup>-1</sup> → 1716cm <sup>-1</sup> → 1706cm <sup>-1</sup> → 2990cm <sup>-1</sup> → 1688cm <sup>-1</sup>                        |             |              |                  |
| (2990, 1652)                                                                                                                            | -           | -            | 2990→1652        |
| (2990, 1648)                                                                                                                            | -           | -            | 2990→1648        |
| (2990, 1623)                                                                                                                            | +           | -            | 1623→2990        |
| (2990, 1618)                                                                                                                            | +           | -            | 1618→2990        |
| (2947, 1652)                                                                                                                            | -           | -            | 2947→1652        |
| (2947, 1648)                                                                                                                            | -           | -            | 2947→1648        |
| (2947, 1623)                                                                                                                            | +           | +            | 2947→1623        |
| (2947, 1618)                                                                                                                            | +           | +            | 2947→1618        |
| 2947cm <sup>-1</sup> → 1618cm <sup>-1</sup> → 1623cm <sup>-1</sup> → 2990cm <sup>-1</sup> → 1648cm <sup>-1</sup> → 1652cm <sup>-1</sup> |             |              |                  |
| (1716, 1652)                                                                                                                            | -           | -            | 1716→1652        |
| (1716, 1648)                                                                                                                            | -           | -            | 1716→1648        |
| (1716, 1623)                                                                                                                            | +           | -            | 1623→1716        |
| (1716, 1618)                                                                                                                            | +           | -            | 1618→1716        |
| (1706, 1652)                                                                                                                            | -           | -            | 1706→1652        |
| (1706, 1648)                                                                                                                            | -           | -            | 1706→1648        |
| (1706, 1623)                                                                                                                            | +           | -            | 1623→1706        |
| (1706, 1618)                                                                                                                            | +           | -            | 1618→1706        |

|                                                                                                                                                                                                                 |   |   |           |
|-----------------------------------------------------------------------------------------------------------------------------------------------------------------------------------------------------------------|---|---|-----------|
| (1688, 1652)                                                                                                                                                                                                    | - | + | 1652→1688 |
| (1688, 1648)                                                                                                                                                                                                    | - | + | 1648→1688 |
| (1688, 1623)                                                                                                                                                                                                    | + | - | 1623→1688 |
| (1688, 1618)                                                                                                                                                                                                    | + | - | 1618→1688 |
| 1618cm <sup>-1</sup> → 1623cm <sup>-1</sup> → 1716cm <sup>-1</sup> → 1706cm <sup>-1</sup> → 1648cm <sup>-1</sup> → 1652cm <sup>-1</sup> → 1688cm <sup>-1</sup>                                                  |   |   |           |
| 2947cm <sup>-1</sup> → 1618cm <sup>-1</sup> → 1623cm <sup>-1</sup> → 1716cm <sup>-1</sup> → 1706cm <sup>-1</sup> → 2990cm <sup>-1</sup> → 1648cm <sup>-1</sup> → 1652cm <sup>-1</sup> →<br>1688cm <sup>-1</sup> |   |   |           |
